# Supplementary material for: A small ribosome-associated ncRNA globally inhibits translation by restricting ribosome dynamics
Source: PubMed Central journal article supplement — RNA Biol. 2021 Jun 13;18(12):2617–32. doi: 10.1080/15476286.2021.1935573 (PMC8632108; doi:10.1080/15476286.2021.1935573), 2021-06-13
Supplement: KRNB_A_1935573_SM7098.pdf [file KRNB_A_1935573_SM7098.pdf]

# Supplementary Data

**A small ribosome-associated ncRNA globally inhibits translation by  
restricting ribosome dynamics**

Julia Reuther<sup>1,†</sup>, Lukas Schneider<sup>1,2,†</sup>, Ioan Iacovache<sup>3,†</sup>, Andreas Pircher<sup>1,2</sup>, Walid H. Gharib<sup>4</sup>, Benoît Zuber<sup>3\*</sup> and Norbert Polacek<sup>1\*</sup>

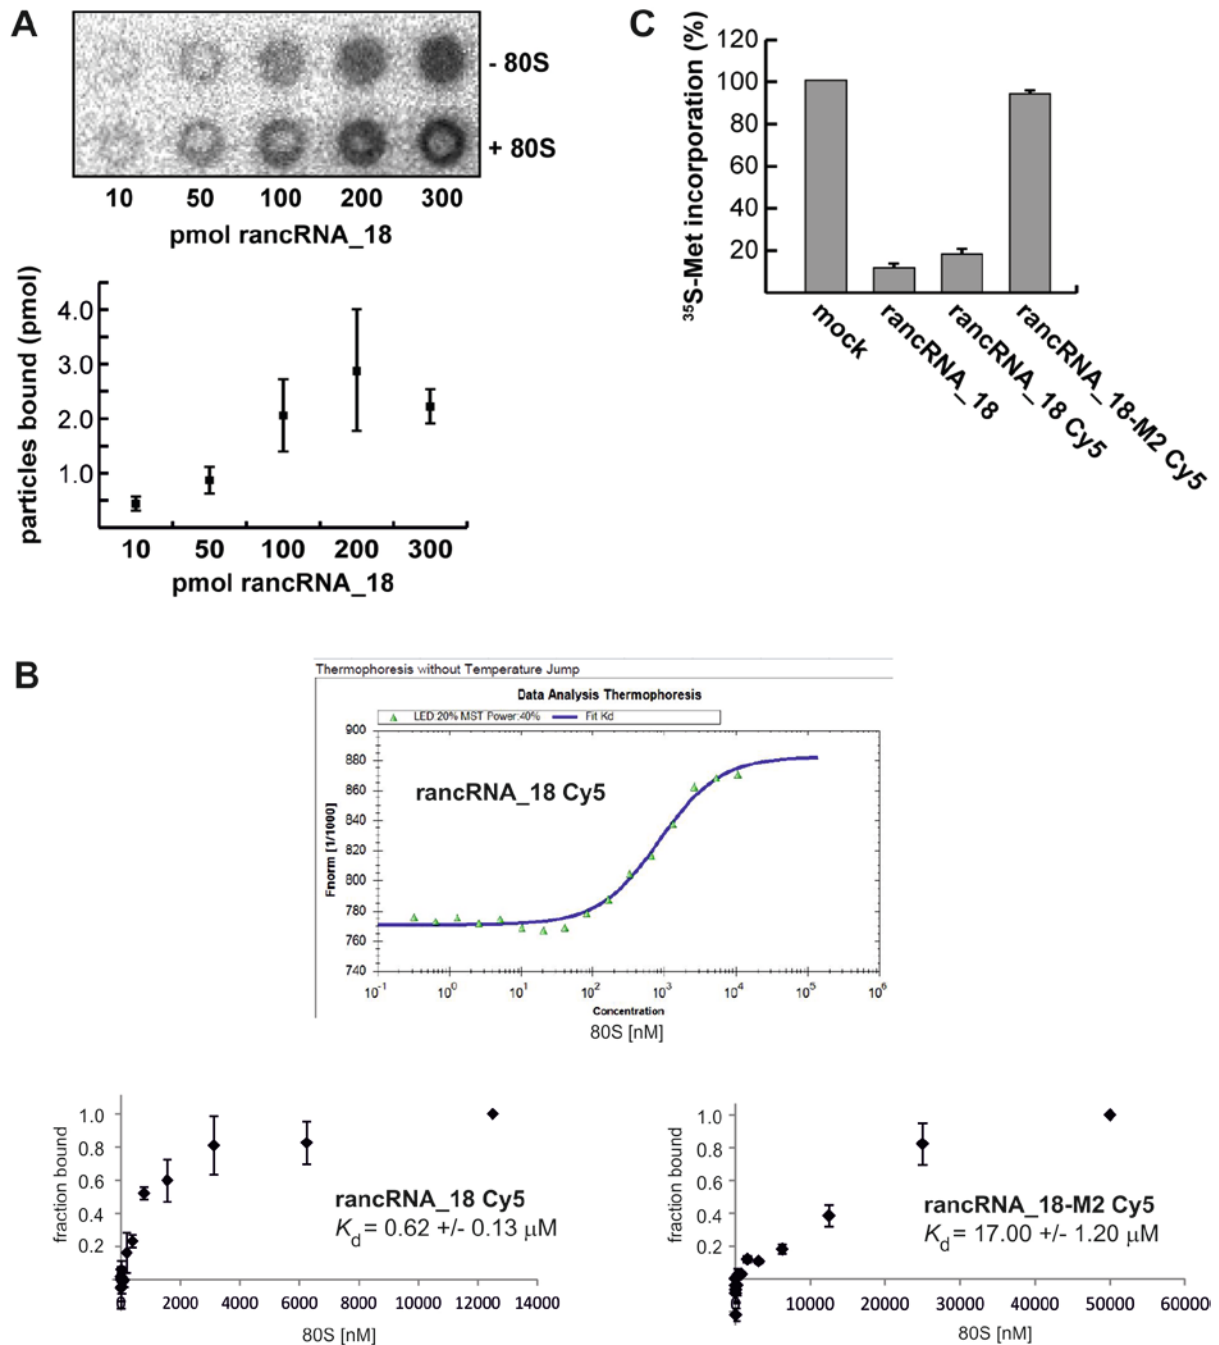

**Supplementary Figure S1:** Biochemical characterization of rancRNA<sub>18</sub>.

**(A)** Dot blot filter binding analysis for increasing amounts of <sup>32</sup>P-labeled rancRNA<sub>18</sub> with 5 pmol 80S ribosomes. Samples without ribosomes (- 80S) served as background controls. n = 3; mean ± SD. **(B)** The interaction of 80S ribosomes with rancRNA<sub>18</sub> was investigated using microscale thermophoresis (MST). For the interaction study, fluorescently labelled (Cy5) RNA (rancRNA<sub>18</sub> or rancRNA<sub>18</sub>-M2) with 80S ribosomal particles was used. The RNA concentration is kept constant while increasing amounts of 80S ribosomes are titrated. Upper part shows the raw MST data from a binding experiment using yeast 80S and

rancRNA\_18 Cy5. The lower part shows the summary of three MST binding experiments with rancRNA\_18 Cy5 (left) and rancRNA\_18-M2 Cy5 (left). The experimentally determined  $K_d$  values for both rancRNA\_18 and rancRNA\_18-M2 are indicated.  $n = 3$ ; mean  $\pm$  SD. **(C)** The effect on global protein synthesis in yeast spheroblasts was assayed by the metabolic labelling approach. Synthetic RNA was introduced via electroporation in the yeast spheroblasts. Incorporation of  $^{35}\text{S}$ -Met was monitored by liquid scintillation counting. A positive control without synthetic RNA was taken as 100%. The relative metabolic labeling activities of samples treated with rancRNA\_18, rancRNA\_18 Cy5, or rancRNA18-M2 Cy5 are shown.  $n = 2$ ; mean  $\pm$  SD

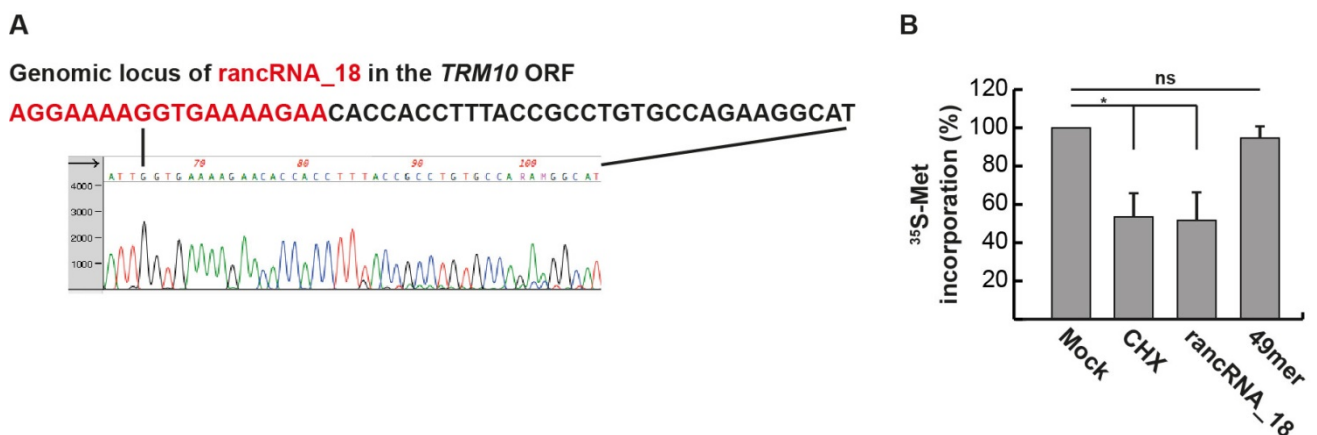

**Supplementary Figure S2:** The 49 nucleotide long 3'-extended rancRNA\_18 is not functional. **(A)** Zoom into the genomic locus of rancRNA\_18 (red) within the *TRM10* ORF with its 3' extension (black) is shown, resulting in the 49-mer RNA molecule. The obtained 3'-RACE sequencing data are shown. **(B)** Unlike rancRNA\_18, the 3'-extended 49-mer does not affect metabolic labeling in yeast spheroblasts. Cycloheximide (CHX) was used as a negative control. Activities were normalized to the mock electroporation control.  $n = 3$ ; mean  $\pm$  SD; \*  $p < 0.05$ .

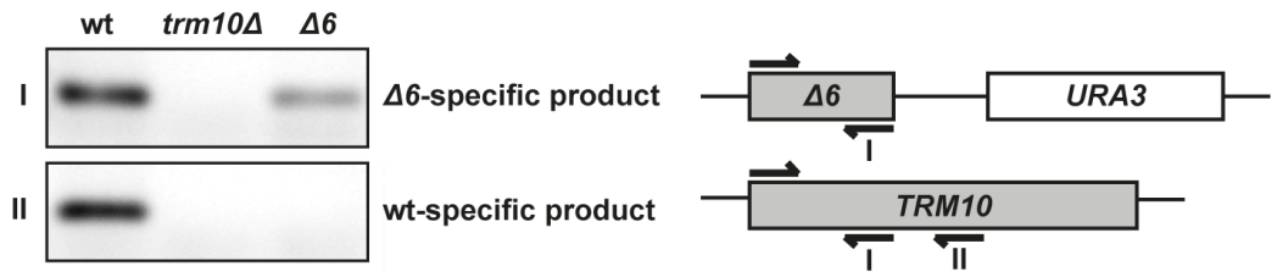

**Supplementary Figure S3:** Validation of the rancRNA\_18 knock-in strain.

Total RNA of wt, *trm10Δ* and Δ6 (the rancRNA\_18 knock-in strain) cells was isolated and reverse transcription PCR was performed with the indicated primers. Reverse primer I amplifies wt and Δ6 cDNA whereas reverse primer II only amplifies wt cDNA.

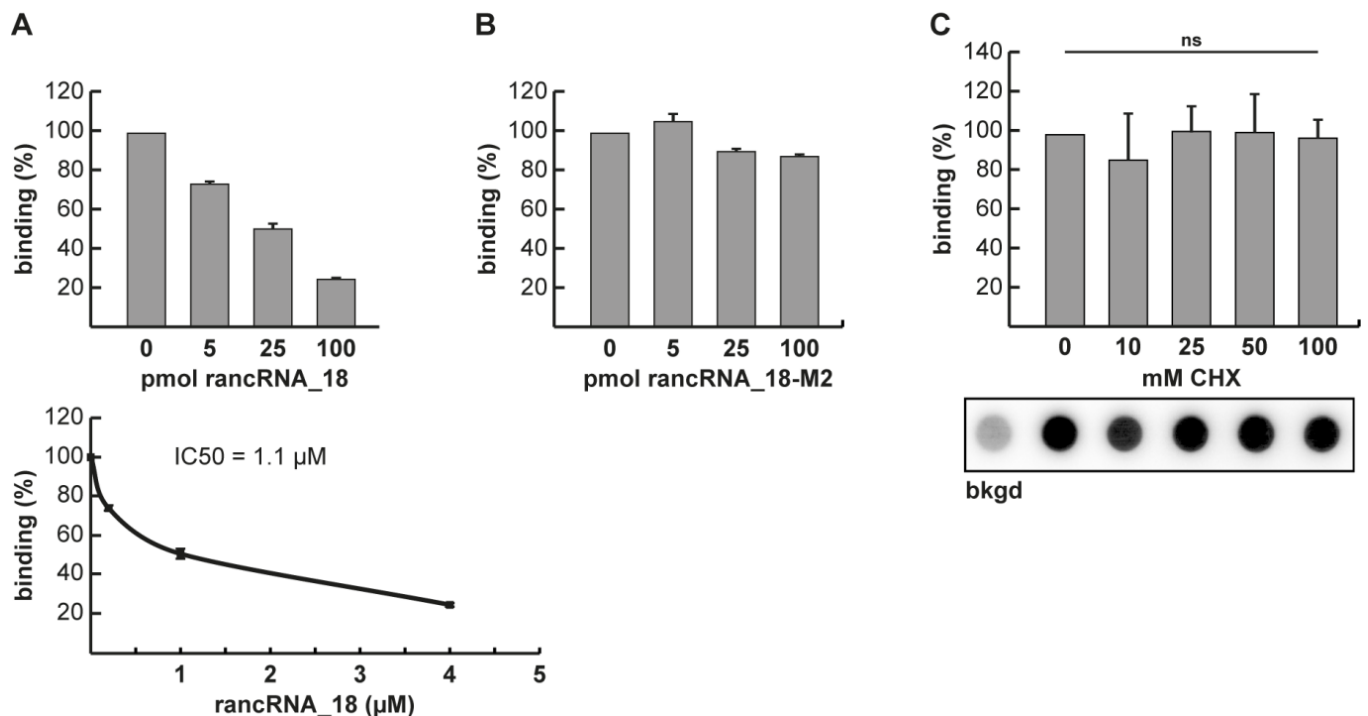

**Supplementary Figure S4:** rancRNA\_18 can be removed from ribosomes by tRNA. **(A)** Binding competition between <sup>32</sup>P-labeled yeast bulk tRNA and increasing amounts of unlabeled rancRNA\_18. tRNA binding efficiency in the absence of rancRNA\_18 was taken as 100%. n = 2; mean ± SD. **(B)** As in (A) but with increasing amounts of unlabeled rancRNA\_18-M2. **(C)** Binding competition between <sup>32</sup>P-labeled rancRNA\_18 and increasing amounts of cycloheximide (CHX). rancRNA\_18 binding in the absence of CHX was taken as 100%. n = 2; mean ± SD

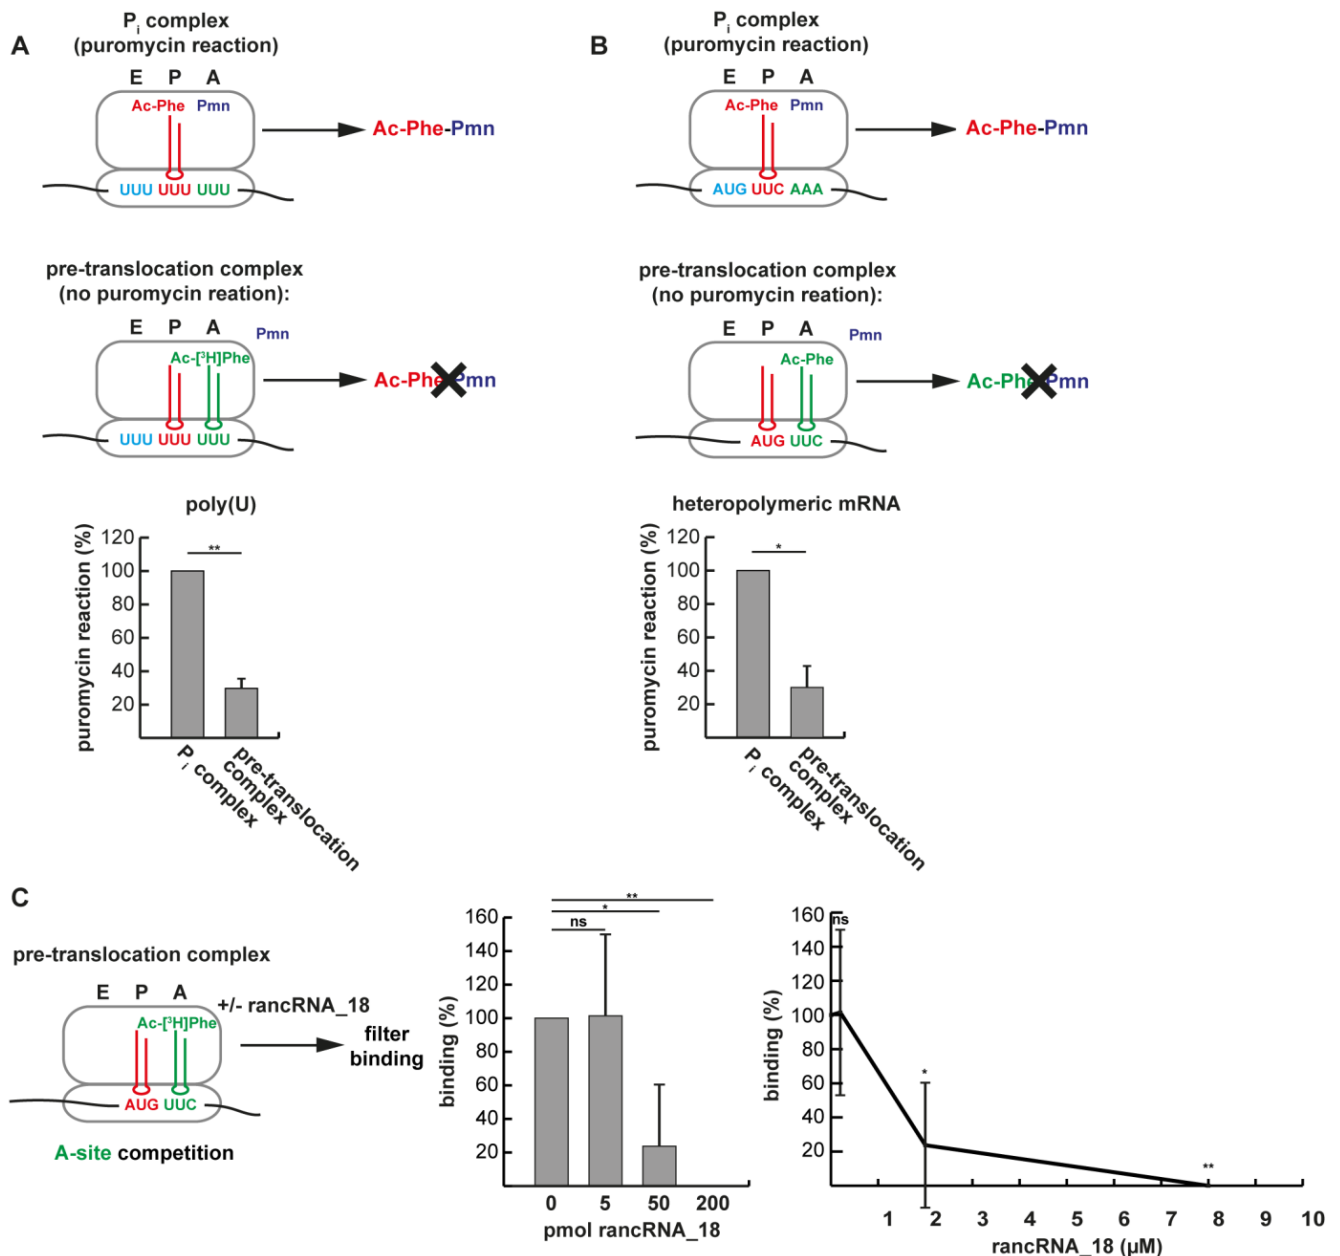

**Supplementary Figure S5:** Validation of ribosome/tRNA complexes with the puromycin reaction and rancRNA\_18/A-tRNA binding competition. **(A)** The initiation-like complex ( $P_i$ ) carrying N-acetyl- $[^3\text{H}]\text{Phe-tRNA}^{\text{Phe}}$  (red) in the P-site can react with A-site bound puromycin (Pmn) to form N-acetyl- $[^3\text{H}]\text{Phe-Pmn}$ . In the pre-translocational complex, when deacylated  $\text{tRNA}^{\text{Phe}}$  (red) and N-acetyl- $[^3\text{H}]\text{Phe-tRNA}^{\text{Phe}}$  (green) are bound to the P- and A-sites, respectively, the peptidyl-tRNA analog (green) cannot react with Pmn.  $n = 3$ ; mean  $\pm$  SD; \*\*  $p < 0.01$ . **(B)** Same as in (A) but using a heteropolymeric mRNA carrying unique Met (AUG) and Phe (UUC) codons.  $n = 3$ ; mean  $\pm$  SD; \*  $p < 0.05$ . **(C)** A pre-translocation complex formed on the heteropolymeric mRNA carrying deacylated  $\text{tRNA}^{\text{Phe}}$  in the P-site (red) and N-acetyl- $[^3\text{H}]\text{Phe-tRNA}^{\text{Phe}}$  in the A-site (green) was used to investigate effects of unlabeled rancRNA\_18 addition on tRNA occupancy. Extent of bound A-site tRNA was assessed via filter binding.  $n = 3$ ; mean  $\pm$  SD; ns, not significant; \*  $p < 0.05$ , \*\*  $p < 0.01$ .

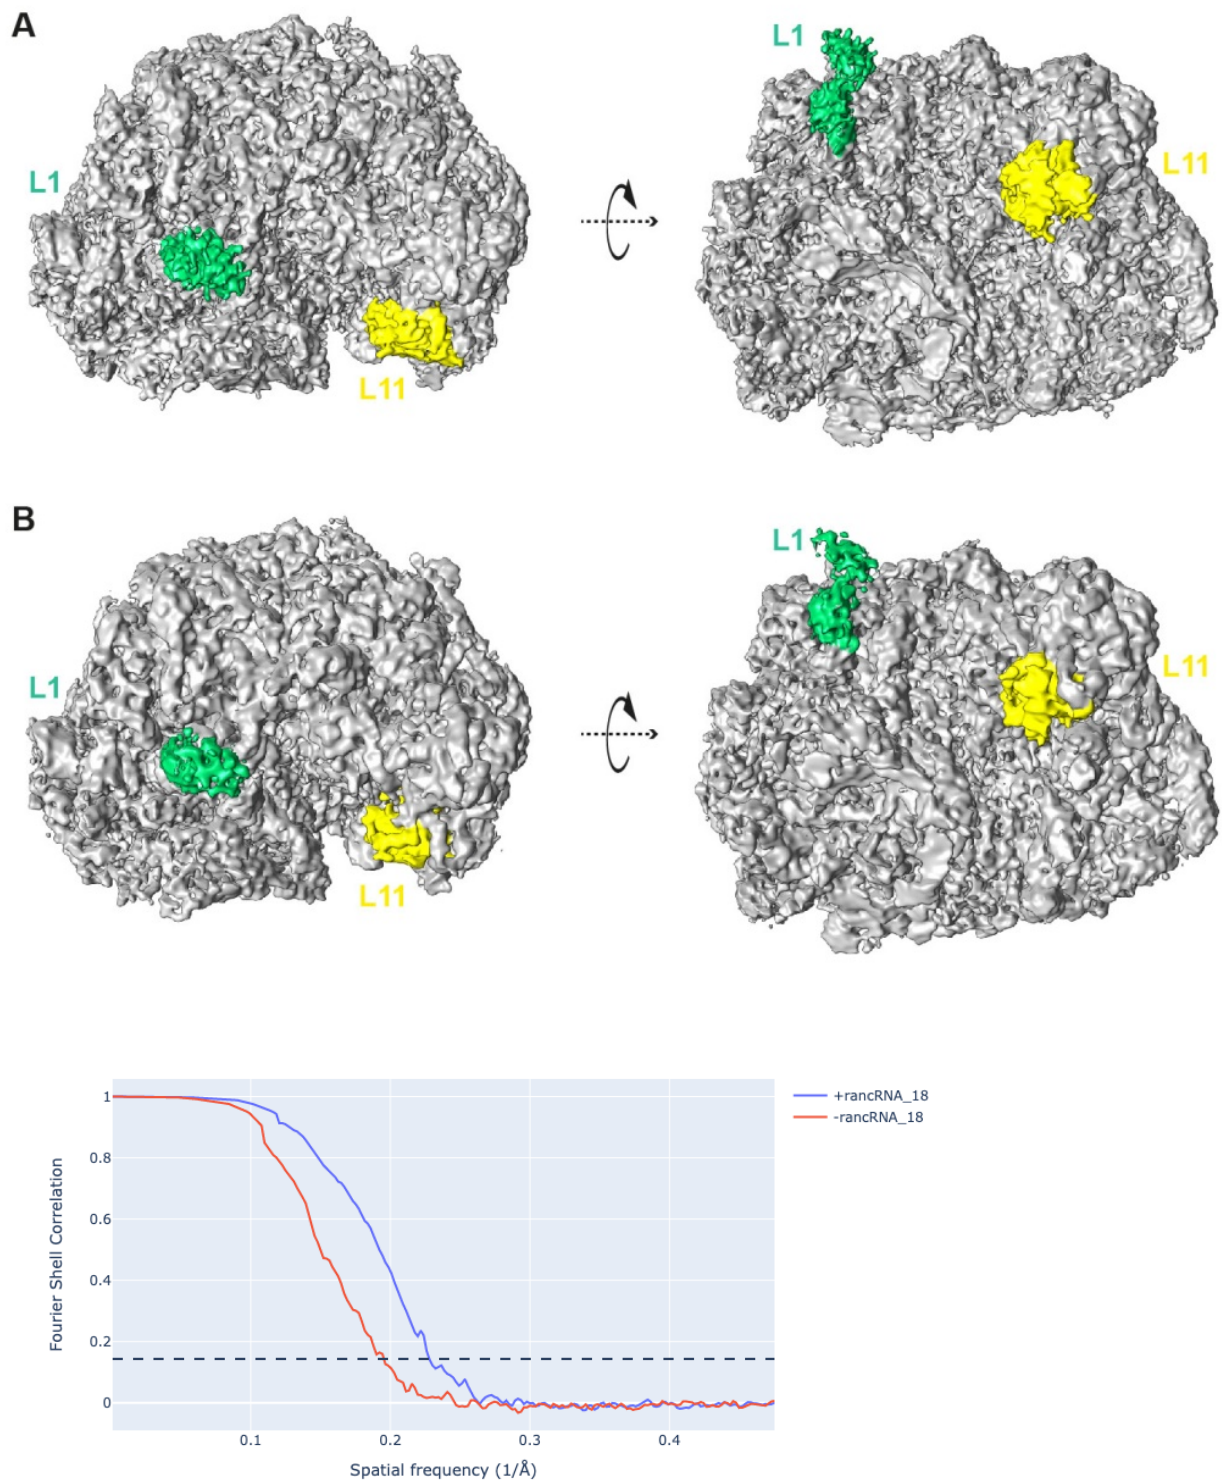

**Supplementary Figure S6:** Multiparticle refinement of the 60S ribosomal subunit.

**(A)** Cryo-EM structure of the *S. cerevisiae* 60S ribosomal subunit in the presence of rancRNA\_18 at 4.4 Å resolution. **(B)** Structure of the 60S ribosomal subunit in the absence of rancRNA\_18 at 5.1 Å resolution. Color code: 60S ribosomal subunit (grey), L1 stalk (green) and region of ribosomal protein L11 (uL5 according to the novel nomenclature of r-proteins) (yellow) are highlighted. Resolution estimate using FSC 0.143 criterion for +/- rancRNA\_18.

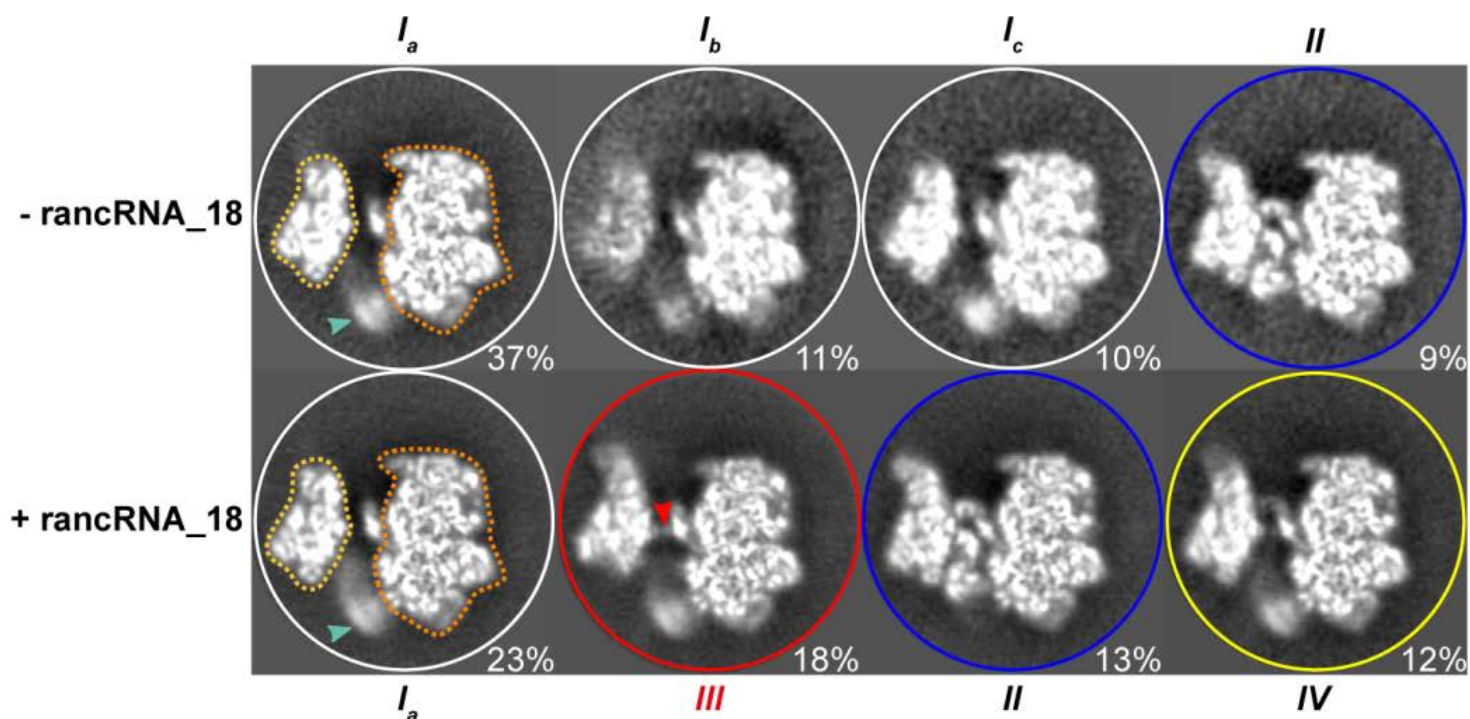

**Supplementary Figure S7:** 3D classification of cryo-EM images. 80S ribosomes without rancRNA\_18 (upper row) showed three classes of empty particles (white frame,  $I_a$ ,  $I_b$  and  $I_c$ ) and a minor class containing densities for P- and E-site tRNAs (blue, II). Cryo-EM samples with rancRNA\_18 (lower row) revealed one empty class (white,  $I_a$ ), one class with densities for P- and E-site tRNAs (blue, II) and a class with density for only P-site tRNA (yellow, IV). Additionally, 18% of the particles showed a rancRNA\_18-dependent extra density between the ribosomal P- and E-sites highlighted with a red arrowhead. The large (dark-orange dotted line) and small (light-orange dotted line) ribosomal subunits and the location of the L1 stalk (green arrowhead) are depicted and relative class abundances (%) are shown.

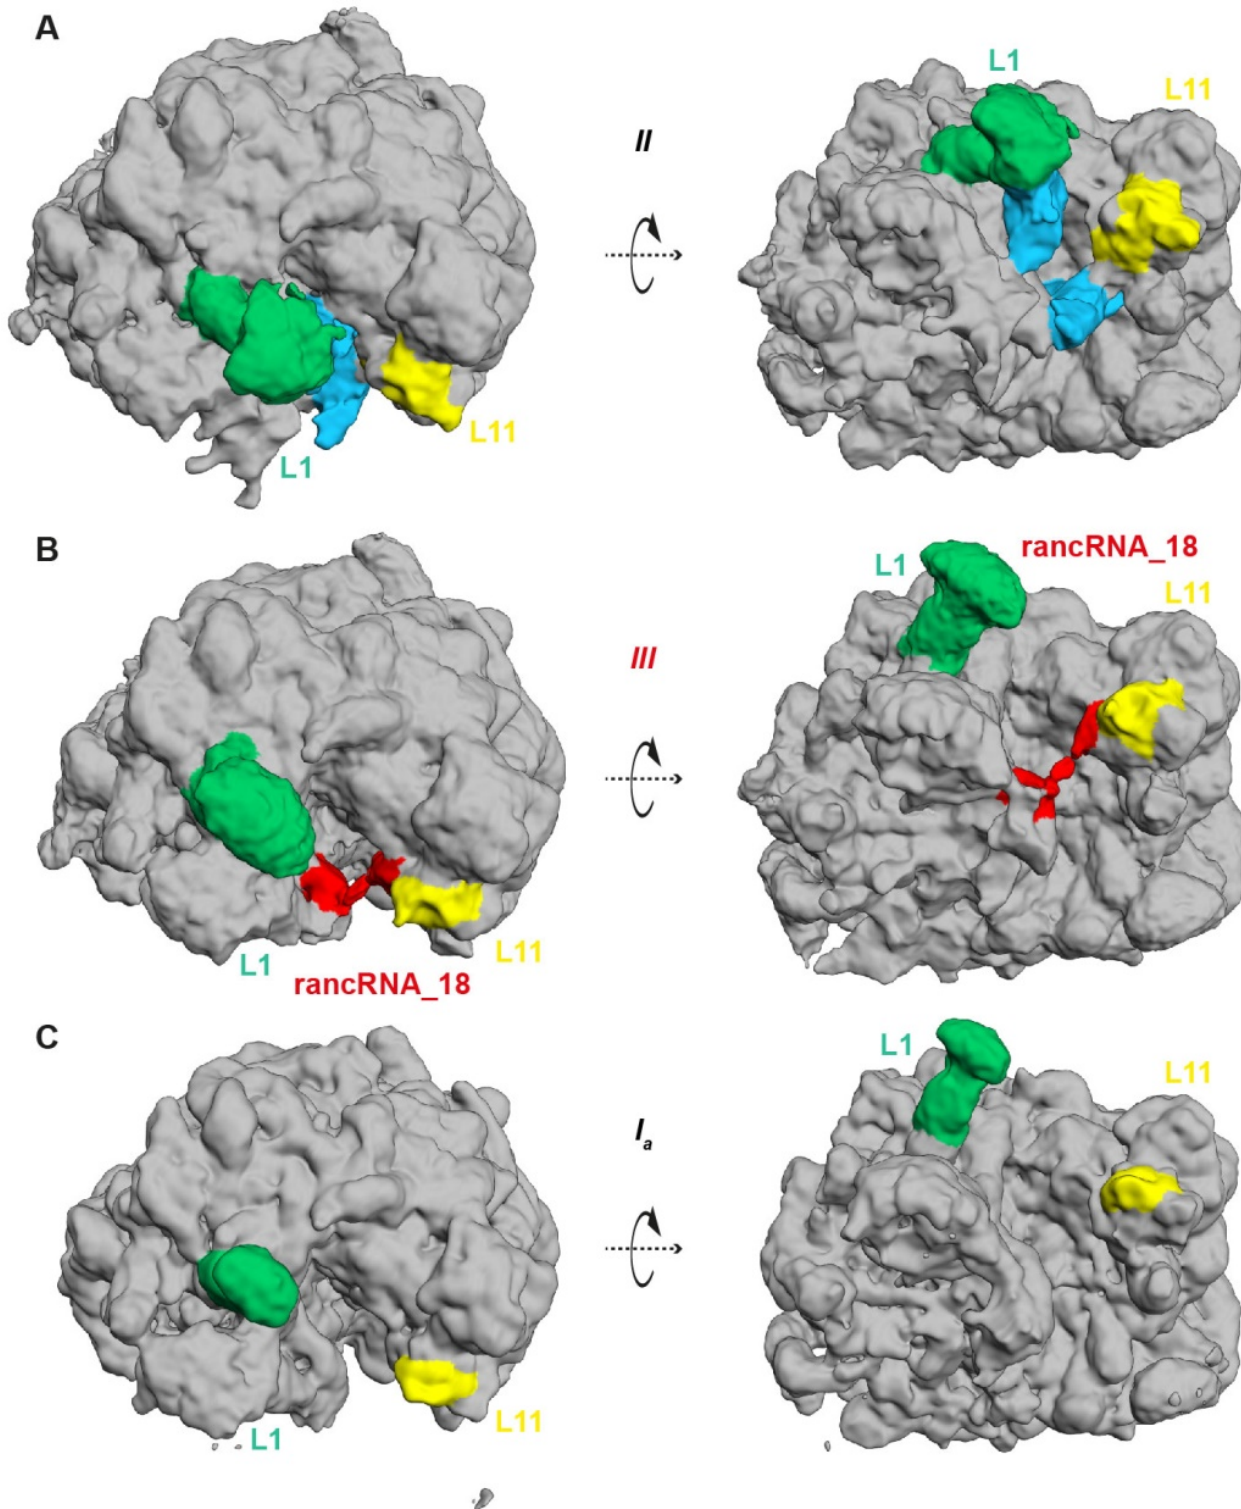

**Supplementary Figure S8:** RancRNA\_18 binding restricts L1 stalk dynamics. Different classes of 60S subunit structures (grey) with **(A)** P- and E-site tRNA (light blue; class *II*) and the L1 stalk (green) in a fully inward position. Ribosomal protein L11 (uL5) is shown in yellow. **(B)** The rancRNA\_18- dependent extra density (red; class *III*) close to the position of ribosomal protein L11 (uL5) (yellow) and the L1 stalk (green) is more ordered and in a slightly inward oriented position compared to the empty particle; **(C)** the empty ribosome (class *I<sub>a</sub>*) with the L1 stalk (green) in the open conformation.



**A**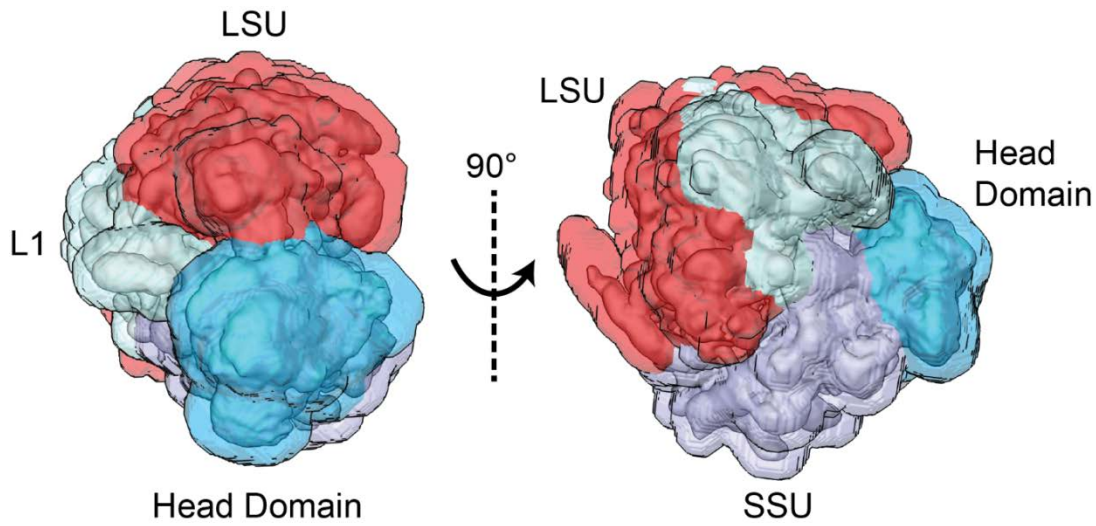**B**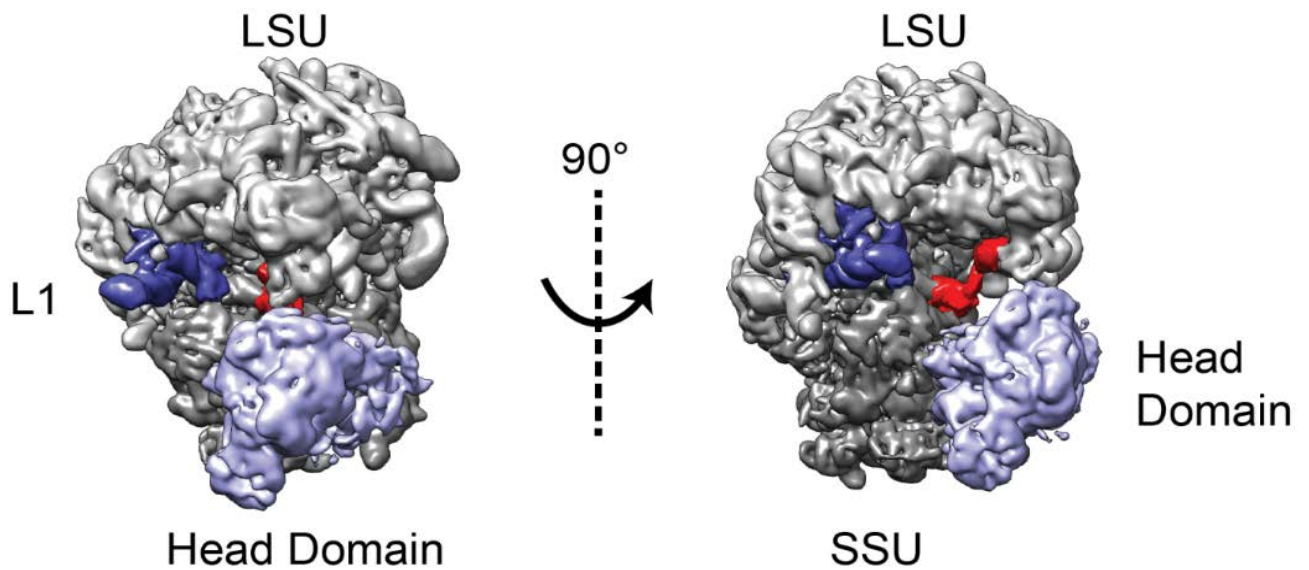

**Supplementary Figure S9: (A)** Illustrations of the masks used to define the four bodies for the multibody analysis of 80S ribosomes. Large ribosomal subunit (LSU) body in red, L1 in green, 40S head domain in blue and small ribosomal subunit (SSU) body in violet. The four masks are shown overlaid on the consensus refinement. **(B)** Refined 80S yeast ribosome with the position of the rancRNA<sub>18</sub>-dependent extra density in red.

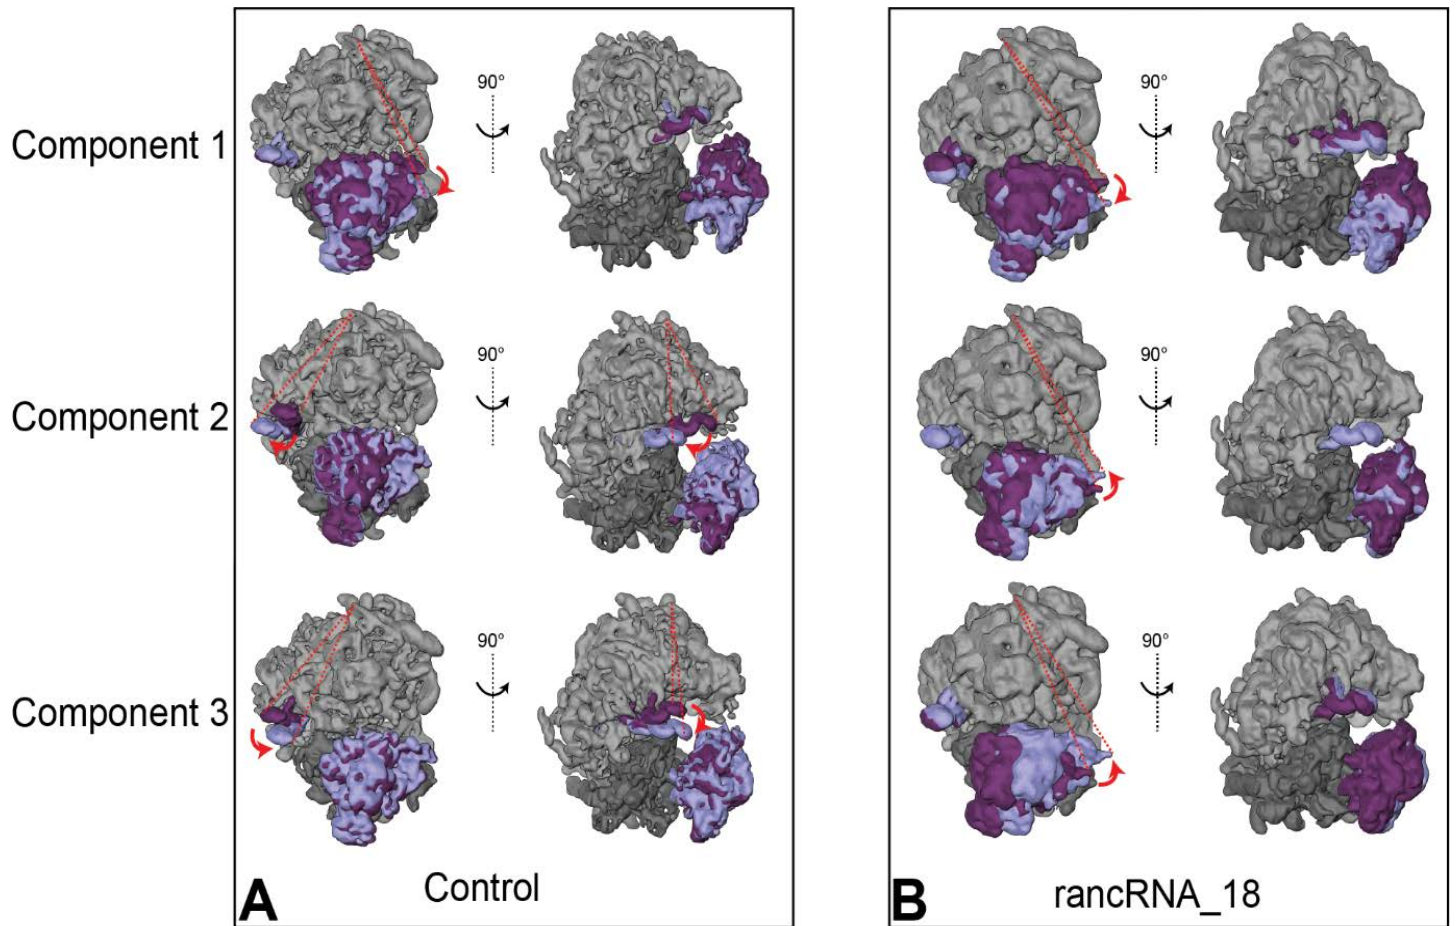

**Supplementary Figure S10:** Illustration of the first three components for the control sample (class I) **(A)** and ribosomal particles carrying the rancRNA\_18-dependent extra density (Supplementary Figure S7; class III) **(B)** shown as the maps at the extremes. For simplicity the maps of the multibody series were docked on the large ribosomal subunit and only the L1 stalk and the small subunit head domain (both in blue) are shown for the last map. The first map is colored light gray for the large subunit, dark grey for the small subunit and violet for the flexible domains L1 stalk and the small subunit head. The coloring of the first map highlights the four masks used to define the four bodies for multibody refinement. The principal components in the control sample show the typical rotation of the head domain (Component 1) as well as movement of the L1 stalk (Components 2 and 3).. In contrast the principal components for the rancRNA\_18 treated sample show only minor movement in the L1 stalk region (B).

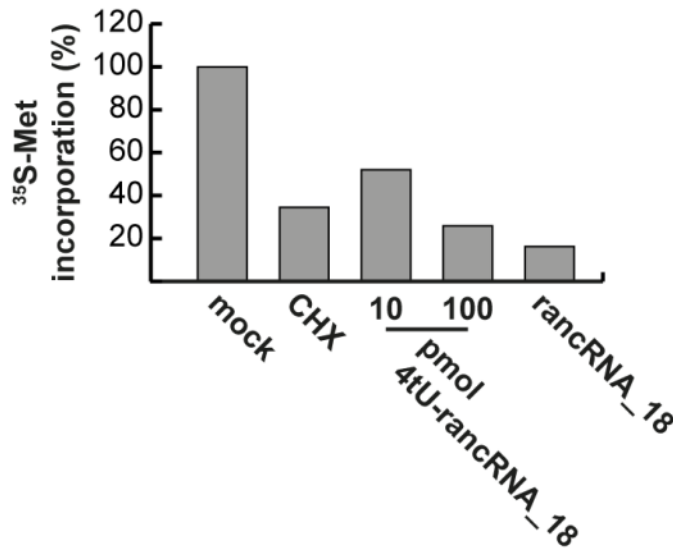

**Supplementary Figure S11:** *In vivo* metabolic labelling experiment shows inhibitory potential of 4tU-rancRNA<sub>18</sub>. Different amounts of 4tU-rancRNA<sub>18</sub> were electroporated into yeast spheroplasts and <sup>35</sup>S-methionine incorporation was measured. Samples electroporated in the absence of synthetic RNA (mock) served as positive control. Metabolic labeling in the presence of cycloheximide (CHX) served as negative control. Electroporated 4tU-rancRNA<sub>18</sub> and unmodified rancRNA<sub>18</sub> (100 pmol) inhibited metabolic labelling to the same extent.

|                           |   |   |   |   |
|---------------------------|---|---|---|---|
| 4tU-rancRNA <sub>18</sub> | + | + | + | - |
| x-link                    | + | + | - | + |
| rancRNA <sub>18</sub>     | - | - | - | + |
| Proteinase K              | - | + | - | - |

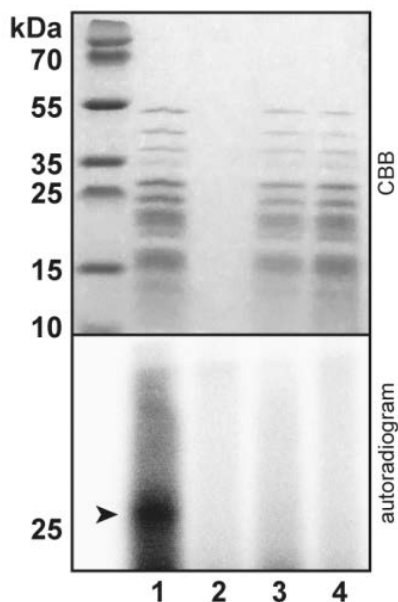

**Supplementary Figure S12:**

RancRNA<sub>18</sub> cross-links to the 60S E-site region. Radioactively labeled (<sup>32</sup>P)-4tU-rancRNA<sub>18</sub> crosslinked to r-proteins were separated on an SDS gel. The autoradiogram showed a cross-link to an r-protein in the size range of around 25 kDa (lane 1). Proteinase K treated sample (lane 2) and experiments in the presence of 4tU-rancRNA<sub>18</sub> without irradiation (lane 3) or in the presence of unmodified rancRNA<sub>18</sub> with irradiation (lane 4) served as controls. CBB, coomassie brilliant blue stain.

## Supplementary Table S1

### DNA Oligonucleotides

| Name                          | 5'-3' sequence                                                                                 |
|-------------------------------|------------------------------------------------------------------------------------------------|
| LNA*_18mer                    | TTCTTTTCACCTTTTCCA (*LNA residue positions were chosen according to manufacturer's suggestion) |
| SC_3'RACE_45mer               | AGGAAAAGGTGAAAAGAACA                                                                           |
| Sc_ivt_49mer_fwd              | GGATCCTAATACGACTCACTATAGGAGGAAAAGGTGAAAAGAACCACCTTTACGCGCT                                     |
| Sc_ivt_49mer_rev              | ATGCCTTCTGGCACAGGCGGTAAAGGTGGTGTTC                                                             |
| Sc_LEU2_rev                   | TTAAGCAAGGATTTTCTTAACTTCTT                                                                     |
| Sc_LEU2_T7_fwd                | GGATCCTAATACGACTCACTATAGGGAGAATGTCTGCCCTAAGAAGATC                                              |
| Sc_TL mutant_fwd              | TGTGCCGAAAGGCATGTCTAAAAAGCAATGGAAAAA                                                           |
| Sc_TL mutant_rev              | CATGCCTTTCGGCACAGGCGGTAAAGGTGGT                                                                |
| Trm10_knock_in_fwd            | CTCGATACAACATTACGTTTTGTAAATTTATCACAAAAGCTTACCATCTTTAGCGATTTGCTGAAGT                            |
| Trm10_knock_in_rev            | CCGCATTGTATTTGGCTTTATT                                                                         |
| TRM10_short_T7_fwd            | GGATCCTAATACGACTCACTATAGGGAGATTACCATCTTTAGCGATTTGCTGAAGT                                       |
| Ura_fwd                       | ATGTCGAAAGCTACATATAAGGAA                                                                       |
| Ura_rev chrI: 18880 – 18840   | AGCAGTCGAAAACCTTTTATGACACAAACACCGTCTTGA TTAGTTTTGCTGGCCGCATCTTCT                               |
| Sc_rnt1_sub.fwd               | GGATCCTAATACGACTCACTATAGGGATGTCCAATGATGAGATAAACCCAGAACG                                        |
| Sc_rnt1_sub.rev               | TCCATTGCTTTTTAGACATGCCCTTCT                                                                    |
| rnt1_control                  | GGCGCCATGCCATGCCATGGACTCATGACATGACATGACGCCTATAGTGAGTCGTAT                                      |
| stem_mut_rev                  | TTCTGGCACAGGCGGTCCCGTGGTG                                                                      |
| stem_mut_fwd                  | AGGAAAAGGTGAAAAGAACCACCCGGGACCGCCT                                                             |
| pe_1_PTC1                     | TAGTGGGTGAACAATCCAA                                                                            |
| pe_2_PTC2                     | ACCGAATTCTGCTTCGGTAT                                                                           |
| pe_3_h76                      | AAGTAAATAACGTTAAAA                                                                             |
| pe_4_h77                      | AAAAGTAGTGGTATTTC                                                                              |
| pe_5_h83                      | AAAATCAAGGGGGCTTTT                                                                             |
| pe_6_h79                      | CCGCTTCATTGAATAAC                                                                              |
| pe_7_h89                      | GCTATGAACGCTTGGCTG                                                                             |
| pe_8_h74                      | ACTAGAGTCAAGCTCAACAG                                                                           |
| pe_9_PTC3                     | GGTATGATAGGAAGAGCC                                                                             |
| pe_10_h86                     | TTTCATGGTTTGTATTCA                                                                             |
| pe_11_h76.2                   | TAAGTAAAGAACTATAAAG                                                                            |
| pe_12_h86.2                   | CACACTGAAAAACAAAAT                                                                             |
| pe_13_5S                      | CGGTCAGGCTCTACCAGC                                                                             |
| pe_14_h88                     | GGTAACTTTTCTGGCACC                                                                             |
| pe_15_h69                     | AATCCATTTCATGCGCGTCA                                                                           |
| pe_16_h68                     | ACTCCCGCCGTTTACCCG                                                                             |
| pe_17_h82                     | AGATTTCTGTTCTCCATGA                                                                            |
| pe_18_h93                     | TCAGTAGGGTAAAACTAA                                                                             |
| TRM10_BamHI_1 (short 2)       | TATATAGGATCCTTTCAGAGTAGTTTCAAACCTTTGC                                                          |
| TRM10_BamHI_2 (short 8)       | TATATAGGATCCCCTTCTGGCACAGGCGGTAAAGGTGG                                                         |
| TRM10_BamHI_3 (short 9)       | TATATAGGATCCGGTAAAGGTGGTGTCTTTTCAC                                                             |
| TRM10_BamHI_4_rev (short 3)   | TATATAGGATCCTTCGCCCTCTATTTCGCGGAGTATG                                                          |
| TRM10_BamHI_short 5 (short 4) | TATATAGGATCCCTCTCTAATCAATTCCTGCGGGACC                                                          |
| TRM10_BamHI_short 6 (short 5) | TATATAGGATCCTGGCGAAGTCTCCTTCTTACAC                                                             |
| TRM10_BamHI_short7 (short 6)  | TATATAGGATCCCCGCATTGTATTTGGCTTTATT                                                             |
| TRM10_BamHI_short8 (short 7)  | TATATAGGATCCACACATTTTTCATTG                                                                    |
| URA3 K.I. fwd                 | gtcttgatcgacacataattcgaatgTTTTATTTAGGTTCTATCGAGG                                               |
| URA3KI_ki_ChrVrev             | caatcatcatccatcgctctaattgtaaactagtataccatcatatGATCCCAATACAACAGATCAC                            |
| TRM10_ki_ChrVfwd              | caattaaaacattatattaagattattgatttgccttttaagggtccTTACCATCTTTAGCGATTTGCTGAAGT                     |
| TRM10_ki_rev                  | cattcgaattatgtcgcgatcaagacCCGCATTGTATTTGGCTTTATT                                               |
| ChrV fwd                      | CAATTAACATTATATTAAGATTATTG                                                                     |
| ChrV rev                      | CAATCATCATCCATCGTC                                                                             |

### RNA oligonucleotides

| Name               | 5'-3' sequence             |
|--------------------|----------------------------|
| rancRNA_18         | AGGAAAAGGUGAAAAGAA         |
| rancRNA_18-M2      | AGGAGAAAGUUAAAAGAA         |
| rancRNA_18-M2-Cy5* | AGGAGAAAGUUAAAAGAA*        |
| 4tU-rancRNA_18     | AGGAAAAGG-4tU-GAAAAG-4tU-A |

## Supplementary Table S2

| sample     | pocket   | component | variance explained [%] | movement         | displacement range [Å] | weighted average displacement [Å] |     |
|------------|----------|-----------|------------------------|------------------|------------------------|-----------------------------------|-----|
| Control    | empty    | 1         | 10.3                   | head rotation    | 35.0                   | 5.6                               |     |
|            |          | 2         | 8.4                    | L1 swing in-out  | 42.0                   | 6.8                               |     |
|            |          | 3         | 8.3                    | L1 swing up-down | 28.0                   | 4.6                               |     |
| RancRNA-18 | empty    | 1         | 11.6                   | head rotation 1  | 26.0                   | 4.7                               |     |
|            |          | 2         | 8.9                    | L1 swing in-out  | 28.0                   | 5.0                               |     |
|            |          | 3         | 8.8                    | head rotation 2  | 24.0                   | 4.6                               |     |
|            | occupied | 1         | 1                      | 11.1             | head rotation 1        | 24.0                              | 4.0 |
|            |          |           |                        |                  | L1 minor swing up-down | 7.4                               | 1.2 |
|            |          | 2         | 1                      | 9.5              | head rotation 2        | 24.0                              | 3.7 |
|            |          |           |                        |                  | L1 minor swing up-down | 6.4                               | 1.0 |
|            |          | 3         | 8.1                    | head rotation 3  | 28.0                   | 4.5                               |     |

**Supplementary Movie S1:** Positioning of the reconstructed densities along the first three vectors showing the principal movements present in the different classes. Empty class from the control data set features large movements of the L1 stalk and the head domain while the rancRNA\_18 data set features minor, restricted L1 stalk movements. Movie was generated with chimera volume series tool and edited in Camtasia.
